# Supplementary material for: Hairpin oligonucleotides anchored terbium ion: a fluorescent probe to specifically detect lead(ii) at sub-nM levels
Source: Royal Society of Chemistry journal article supplement (doi:10.1039/c3an36795a), 2013-01-01
Supplement: c3an36795a.pdf [file c3an36795a.pdf]

## Supporting Information

### Hairpin Oligonucleotides Anchored Terbium ion: A Fluorescent Probe to Specially Detect Lead (II) in Sub-nM Level

*Yueteng Wei, Ru Liu, Yaling Wang, Yuliang Zhao, Zhifang Cai and Xueyun Gao\**

CAS Key Laboratory for Biomedical Effects of Nanomaterials and Nanosafety, Institute of High Energy Physics, Chinese Academy of Sciences, Beijing 100049, People's Republic of China

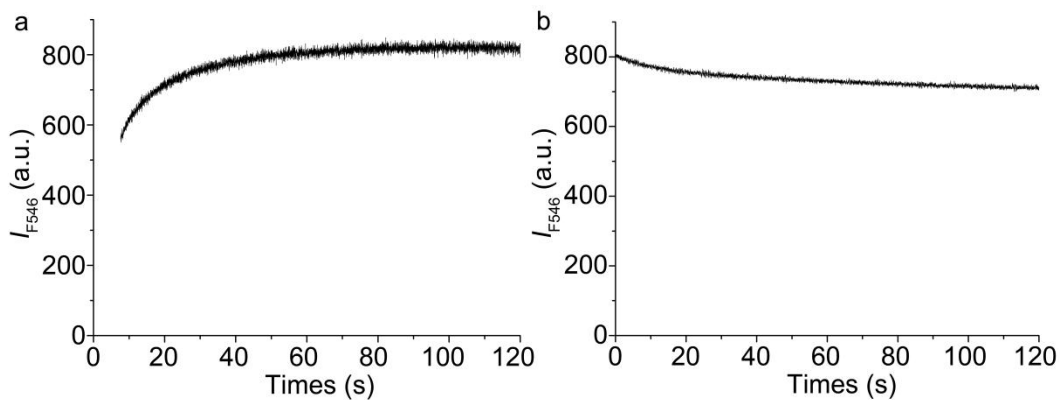

**Figure S1.** (a) Kinetics of fluorescence intensity of Tb-GH5 (emission at 546 nm), counted from the terbium ions begin to coordinate with GH5. (b) Photo-bleaching of Tb-GH5 probe under the excitation at 260 nm.

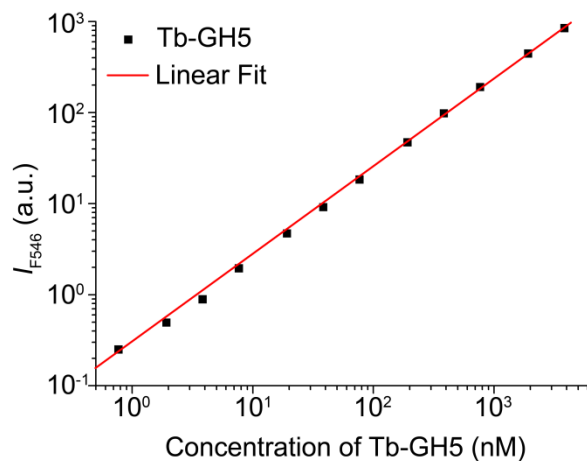

**Figure S2.** Fluorescence of Tb-GH5 probe plotted with respect to its series concentration (from 0.77 nM to 3.85  $\mu$ M). The fluorescence shows a linear relation, which is a good optical feature for a probe.

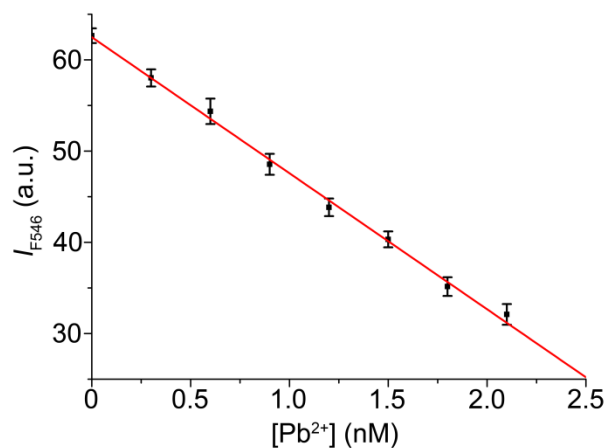

**Figure S3.** Fluorescence intensity of Tb-GH5 (3.85 nM, with other metal ions of 1 nM each) plotted with respect to the concentration of  $Pb^{2+}$ . The fluorescence shows a linear relation. LOD is 0.1 nM.
